# Supplementary material for: High-performance magneto-mechano-electric generator through optimization of magnetic flux concentration
Source: Royal Society of Chemistry journal article supplement (doi:10.1039/d2se00445c), 2022-01-01
Supplement: d2se00445c1.pdf [file d2se00445c1.pdf]

# High-Performance Magneto-Mechano-Electric Generator through Optimization of Magnetic Flux Concentration

---

## Supporting information

Han Seung Choi,<sup>1</sup> Venkateswarlu Annapureddy,<sup>2</sup> Nokeun Park,<sup>1,5</sup> Jae-Won Jeong,<sup>3</sup> Geon-Tae Hwang,<sup>4</sup> and Jungho Ryu<sup>1,5</sup>

\* Corresponding Author: [jhryu@ynu.ac.kr](mailto:jhryu@ynu.ac.kr)

<sup>1</sup> Yeungnam University  
School of Materials Science and Engineering  
Gyeongsan 38541  
Korea

<sup>2</sup> Department of Physics, National Institute of Technology Tiruchirappalli  
Flexible & Multi-Functional Materials Device Lab (FM2D Lab),  
Tiruchirappalli, Tamil Nadu 620015  
India

<sup>3</sup> Korea Institute of Materials Science (KIMS)  
Metal Powder Department  
Changwon 51508  
Korea

<sup>4</sup> Pukyong National University  
Department of Materials Science & Engineering,  
Busan 42601,  
Korea

<sup>5</sup> Yeungnam University  
Institute of Materials Technology  
Gyeongsan 38541  
Korea

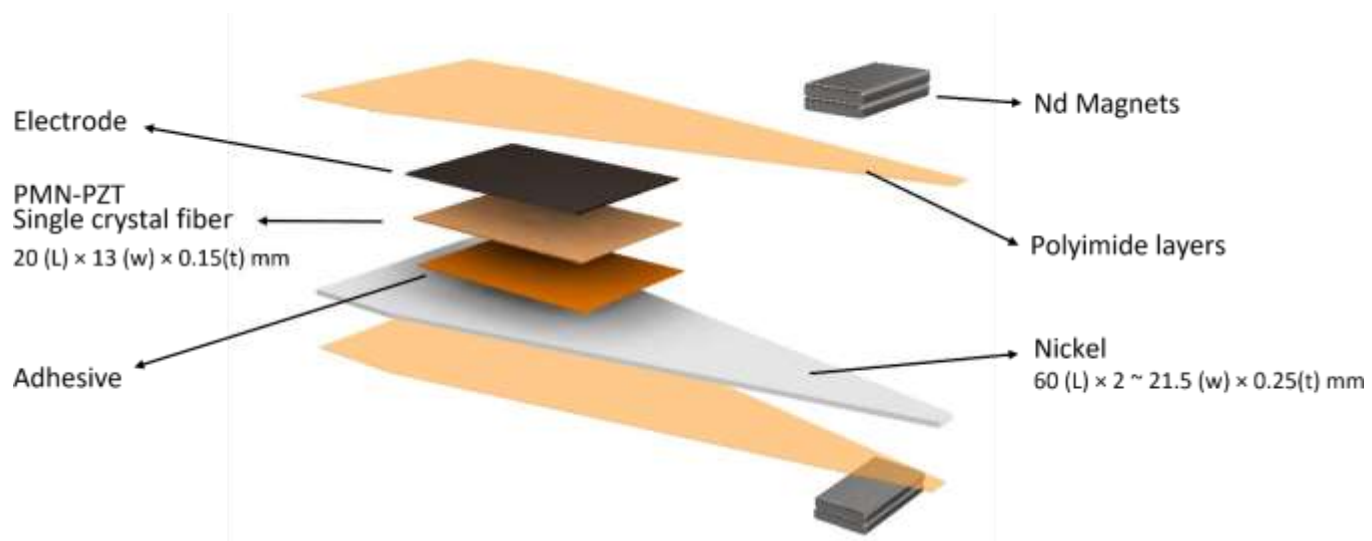

Figure S1 Schematic depiction of MME generator comprising magnetostrictive Ni, interfacial adhesive, PMN–PZT single-crystal fibers (SCFs), polyimide, and proof mass of neodymium (NdFeB) magnets.

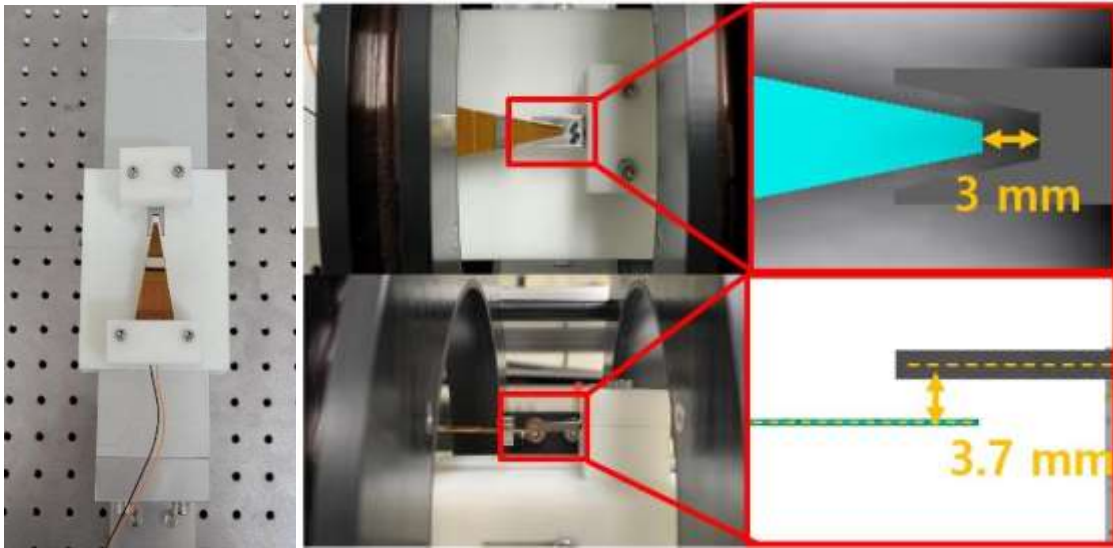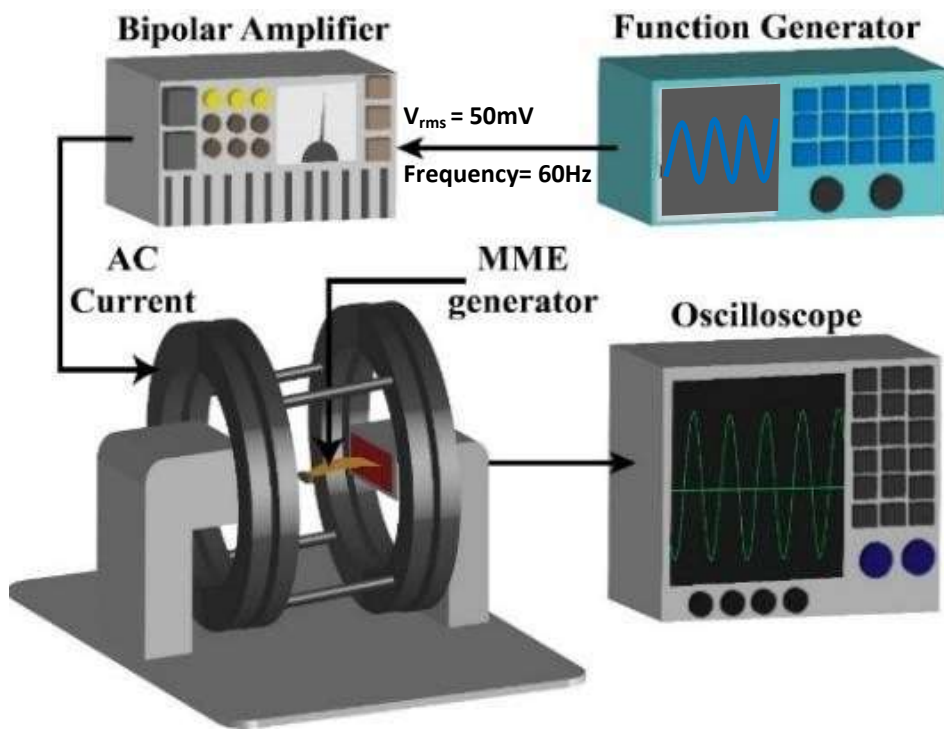

Figure S1 The setup for measuring the output performance of the MME generator.

| <b>MFC Material</b>              | <b>Permeability, <math>\mu</math> (H/m)</b> | <b>Relative permeability, <math>\mu/\mu_0</math></b> | <b>Remark</b> |
|----------------------------------|---------------------------------------------|------------------------------------------------------|---------------|
| Nickel, Ni                       | $1.26-7.54 \times 10^{-4}$                  | 100-600                                              | low           |
| Magnetic steel with STS430 grade | $\sim 2.25 \times 10^{-3}$                  | 1000 - 1800                                          | medium        |
| Pure-iron (Fe)                   | $\sim 6.3 \times 10^{-3}$                   | 5000                                                 | high          |

**Table S1. The material properties of materials used as MFCs**

## 5 Oe

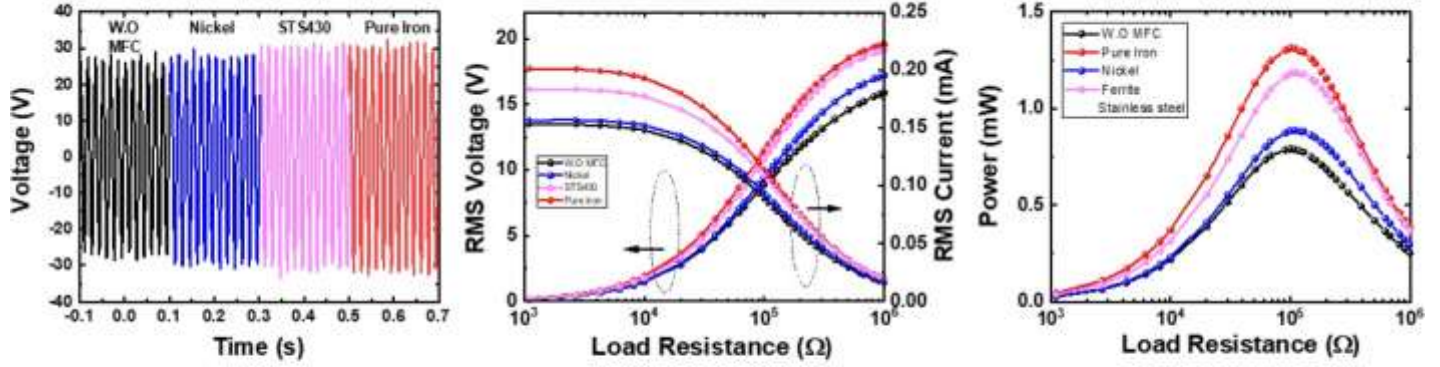

## 10 Oe

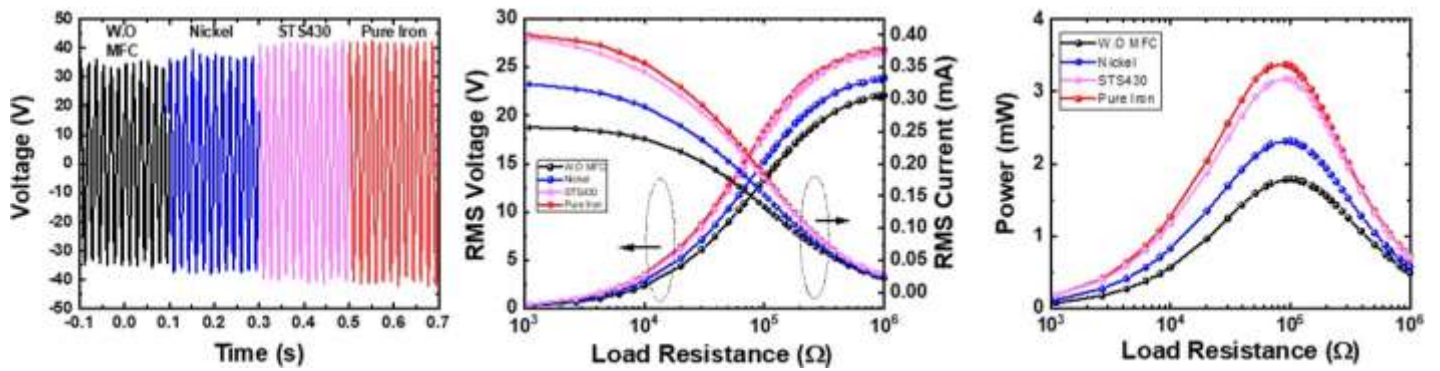

Figure S3 Additional data (Magnetic field dependency at 5 Oe and 10 Oe).
